# Supplementary material for: Anchor-based minimal important difference values are often sensitive to the distribution of the change score
Source: Qual Life Res. 2024 Feb 6;33(5):1223–32. doi: 10.1007/s11136-024-03610-6 (PMC11045581; doi:10.1007/s11136-024-03610-6)
Supplement: Supplementary file 2 — Supplementary file1 (DO 9 KB) [file 11136_2024_3610_MOESM2_ESM.do]

clear all 


*** auxiliary program to determine the parameters of a mixture distribution 

program define computepars 
  syntax , mu(real) sigma(real) 
  local fac 2.0 
  local p1=0.75
  local p2=1-`p1' 
  local mu1=`mu'-`fac'*`sigma'*`p2' 
  local mu2=`mu'+`fac'*`sigma'*`p1' 
  local newsigma2 = `sigma'^2 - `p1'*`p2'*(`mu2'-`mu1')^2  
  local newsigma=sqrt(`newsigma2')
  c_local p1= `p1' 
  c_local p2= `p2'
  c_local mu1= `mu1' 
  c_local mu2= `mu2'
  c_local newsigma = `newsigma'
end 

*** genC : drawing the change score C from a normal distribution 

program define genC 
  syntax , mu(real) sigma(real) disttype(string) 
  if "`disttype'"=="normal" { 
    gen C=rnormal(`mu',`sigma')
  }
  else if "`disttype'"=="mixture" {
    computepars, mu(`mu') sigma(`sigma')    
    gen C= cond(runiform()<=`p1',rnormal(`mu1',`newsigma'),rnormal(`mu2',`newsigma'))
  }
  else error 99999
end 

*** genAgivenC: Drawing the anchor variable A from the conditional 
*** distribution of A given C  

program define genAgivenC 
  syntax ,  link(string) scale(real) beta(real) [keepcum] kappalist(numlist)
  forvalues i=1/6 { 
  	gettoken kappa`i' kappalist : kappalist 
  }
  forvalues i=1/6 { 
        gen cum`i' = `link'(`scale'*(`kappa`i'' - `beta' * C )) 
  }
  gen cum7=1 
  gen A = irecode(runiform(),0,cum1,cum2,cum3,cum4,cum5,cum6,cum7) 
  if "`keepcum'"!="keepcum" drop cum* 
  label define labA 1 "much worse" 2 "worse" 3 "little worse" 4 "no change" /// 
                    5 "little better" 6 "better" 7 "much better"  
  label values A labA 
end 

*** genRgivenA: Reducing the anchor variable A to a binary indicator variable R 

program define genRgivenA 
 gen R= A>=5 
end 

*** The six methods to compute MID values. The MID value is returned as the 
*** local c 


program MIDmean , rclass 
  sum C if A==4 , meanonly 
  return local c `r(mean)' 
end 

program MIDYouden, rclass  
  preserve 
  keep C 
  qui gen cut=(C[_n]+C[_n+1])/2 
  qui drop if _n==_N 
  keep cut 
  tempfile cut 
  qui save `cut' 
  restore 
  preserve 
  cross using `cut' 
  gen aux= C>cut  
  gen correct=aux==R 
  collapse correct , by(R cut)  
  qui reshape wide correct, i(cut) j(R) 
  gen sum = correct0 + correct1 
  egen max=max(sum) 
  qui keep if max==sum 
  gen u=runiform() 
  sort u 
  qui keep if _n==1 
  return local c=cut 
  restore 
end 

program MIDpredictive , rclass 
  preserve 
  qui logit R C
  local alpha=_b[_cons] 
  local  beta=_b[C] 
  qui sum R , meanonly 
  local p = r(mean)
  return local c =  (logit(`p')-`alpha')/`beta' 
  return local c50 = -`alpha'/`beta' 
  restore 
end 


program MIDadjust , rclass 
  syntax , midpredictive(real) 
  qui sum C 
  local sdc=r(sd) 
  qui corr C R 
  local r=r(rho) 
  local S = 0.09*`sdc' + 0.103 * `sdc' * `r'
  qui sum R, meanonly 
  local p = r(mean)
  return local c =  `midpredictive' - `S' * logit(`p') 
end 


program MIDdiff, rclass 
  preserve 
  qui keep if inlist(A,3,4) 
  collapse C, by(A) 
  return local c = C[2]-C[1] 
end 


*** describesimu: drawing the figues illustrating the simulation setup 

program define describesimu 
  syntax , type(string) 

local col2 navy 
local col3 forest_green
local col4 dkorange 
local col5 cranberry

clear
set obs 1000 
gen C = -10 + (2*_n-1)/(2*_N)*25 
genAgivenC , keepcum link(${`type'link})  scale(${`type'scale}) /// 
             kappalist(${`type'kappalist}) beta(${`type'beta}) 
set scheme s1rcolor 
twoway area cum7 cum6 cum5 cum4 cum3 cum2 cum1 C  , /// 
  legend( row(2) label(7 "much worse") label(6 "worse") label(5 "little worse") ///
	      label(4 "no change") label(3 "little better") label(2 "better") /// 
		  label(1 "much better") symxsize(*0.8) symysize(*0.9) size(*0.9) ) /// 
  xtitle(change score c) xmtick(##5, tlc(black) ) ///
  graphregion(color(ltbluishgray)) plotregion(fcolor(white)) /// 
  xlabel(,labc(black) tlc(black)) ylabel(,labc(black) tlc(black)) ///
  xtitle(, col(black))  legend( region(fcolor(white) lcolor(black)) color(black)) /// 
  yscale(lcolor(black)) xscale(lcolor(black)) /// 
  nodraw name(g1,replace) 
  
set scheme s2color 
 
local count 1
foreach sigma of numlist ${`type'sigmalist} {  
  local labels `labels' label(`count' "{&sigma} = `sigma'") 
  local order `order' `count' 
  foreach mu of numlist ${`type'mulist}   { 
    local ++count 
	genfexpr, disttype(${`type'distC}) mu(`mu') sigma(`sigma') 
    local cmd `cmd'  ///
	  (function `r(fexpr)' , lcol(`col`sigma'') lwidth(*1.7) range(-10 15) n(250)) 
  }
}
twoway `cmd' , nodraw name(g2,replace) xtitle(change score c) ytitle(density) /// 
   xtitle(change score c) legend(`labels' order(`order') row(1)) xmtick(##5)
graph combine g1 g2, col(1) xsize(7) ysize(7) iscale(*0.9) 
graph export figdescribesimu`type'.pdf , replace 

end 

program genfexpr , rclass
  syntax , disttype(string) mu(real) sigma(real) 
  local funcnormal normalden(x,\`mu',\`sigma')
  local funcmixture \`p1'*normalden(x,\`mu1',\`newsigma')  +  /// 
            \`p2'*normalden(x,\`mu2',\`newsigma')
  if "`disttype'"=="mixture" computepars, mu(`mu') sigma(`sigma') 
  return local fexpr `func`disttype''
end 


*** conductsimu: Performing the simulation study

program define conductsimu 
  syntax , type(string) 

set seed 12345678 

tempname hhh 
postfile `hhh' mu sigma rep  rho prev /// 
   MIDmean MIDYouden MIDpredict MID50 MIDadjust  MIDdiff using results`type', replace
forvalues rep=1/$REP { 
 di "repetition: `rep'"
 foreach mu of numlist ${`type'mulist}   { 
   foreach sigma of numlist ${`type'sigmalist}  { 
    clear 
    qui set obs 123 
    genC, mu(`mu') sigma(`sigma')  disttype(${`type'distC}) 
    genAgivenC  , link(${`type'link}) scale(${`type'scale}) /// 
	   kappalist(${`type'kappalist}) beta(${`type'beta}) 
    MIDmean
    local MIDmean = r(c) 
    genRgivenA 
    MIDYouden
    local MIDYouden=r(c)
    MIDpredictive 
    local MIDpredict = r(c)  
	local MID50 =r(c50) 
	MIDadjust , midpredictive(`MIDpredict')
	local MIDadjust = r(c) 
	MIDdiff 
    local MIDdiff = r(c)  
	qui spearman A C 
	local rho = r(rho)
	qui sum R, meanonly 
	local prev = r(mean)
    post `hhh' (`mu') (`sigma') (`rep') (`rho') (`prev')  /// 
	    (`MIDmean')  (`MIDYouden') (`MIDpredict') (`MID50') (`MIDadjust') (`MIDdiff') 
  }
 }
} 
postclose `hhh' 

end 

*** reportsimu: reporting the results of the simulationstudy 

program define reportsimu 
  syntax , type(string) stat(string)
 
  local col2 navy 
  local col3 forest_green
  local col4 dkorange 
  local col5 cranberry
  
  set linesize 80
  
*** Making tables depicting the correlation and prevalence values 
  cap log close 
  log using tablecorr`type', text replace 
  use results`type', clear 
  table mu sigma , content(mean rho p10 rho p90 rho) format(%5.3f) 
  table mu sigma , content(mean prev p10 prev p90 prev) format(%5.3f) 
  
  log close 

*** Making a table with the mean MID values and their standard errors 

  cap log close 
  log using tableresults`type', text replace 
  use results`type' , clear 
  drop rho 
  reshape long MID , i(mu sigma rep) j(method) string 
  table method mu sigma , content(mean MID sem MID) format(%5.3f) 
  log close 
 
*** Drawing the graphs showing the results of the simulation study 

  use results`type', clear 
  collapse (`stat') MID* , by(mu sigma)
  reshape long MID , i(mu sigma) j(type) string 
  sort type mu sigma 
  gen ntype=. 
  replace ntype=1 if type=="mean" 
  replace ntype=2 if type=="Youden" 
  replace ntype=3 if type=="diff" 
  replace ntype=4 if type=="predict" 
  replace ntype=5 if type=="adjust" 
  replace ntype=6 if type=="50" 
  label define labtype 1 "mean" 2 "Youden" 3 "diff" 4 "predict" 5 "adjust" 6 "50" 
  label values ntype labtype 
  levelsof sigma , local(sigmas)
  local cmd 
  local labels 
  local count 0 
  foreach sigma of local sigmas { 
    local cmd `cmd' ///
      (scatter MID mu if sigma==`sigma' , ///
	     c(l) lcol(`col`sigma'') mcol(`col`sigma'') sort(mu) msize(*0.7)) 
    local labels `labels' label(`++count' {&sigma} = `sigma') 
  } 
  local stattitle average 
  if "`stat'"=="median" local stattitle median 
  twoway `cmd', ///
    by(ntype, note("") row(1) iscale(*1.1) scale(*1.4)) ///
    xsize(7) ysize(3)  legend(`labels' row(1)) ///
    xtitle({&mu}) ytitle(`stattitle' MID value) yscale(range(-2 6))
  graph export figsimuresults`type'.pdf , replace 
  clear 
end 


*** defining the simulation setups 


global Amulist 0 2 4 6 
global Asigmalist 2 3 4 5 
global AdistC normal 
global Alink invlogit  
global Ascale `=sqrt(_pi^2/3)' 
global Akappalist -5 -3 -1 1 3 5 
global Abeta 0.4 

global Bmulist 0 2 4 6 
global Bsigmalist 2 3 4 5 
global BdistC mixture 
global Blink normal 
global Bscale 1.0 
global Bkappalist -5 -3.5 -1 1 2 5
global Bbeta 0.4 

global Cmulist 0 2 4 6 
global Csigmalist 2 3 4 5 
global CdistC normal 
global Clink invlogit  
global Cscale `=sqrt(_pi^2/3)' 
global Ckappalist -2.5 -1.5 -0.5 0.5 1.5 2.5   
global Cbeta 0.2  

global REP 1000

set scheme s2color 

*** performing all computations 

describesimu, type(A) 
conductsimu, type(A) 
reportsimu, type(A) stat(mean)


describesimu, type(B)
conductsimu, type(B) 
reportsimu, type(B) stat(mean)


describesimu, type(C)
conductsimu, type(C) 
reportsimu, type(C) stat(median)
